# Supplementary material for: Serum Progesterone Profile Across the Mid and Late Luteal Phase in Artificial Cycles Is Associated With Pregnancy Outcome
Source: PubMed Central journal article supplement (PMC8224169; doi:10.3389/fendo.2021.665717), 2021-06-10

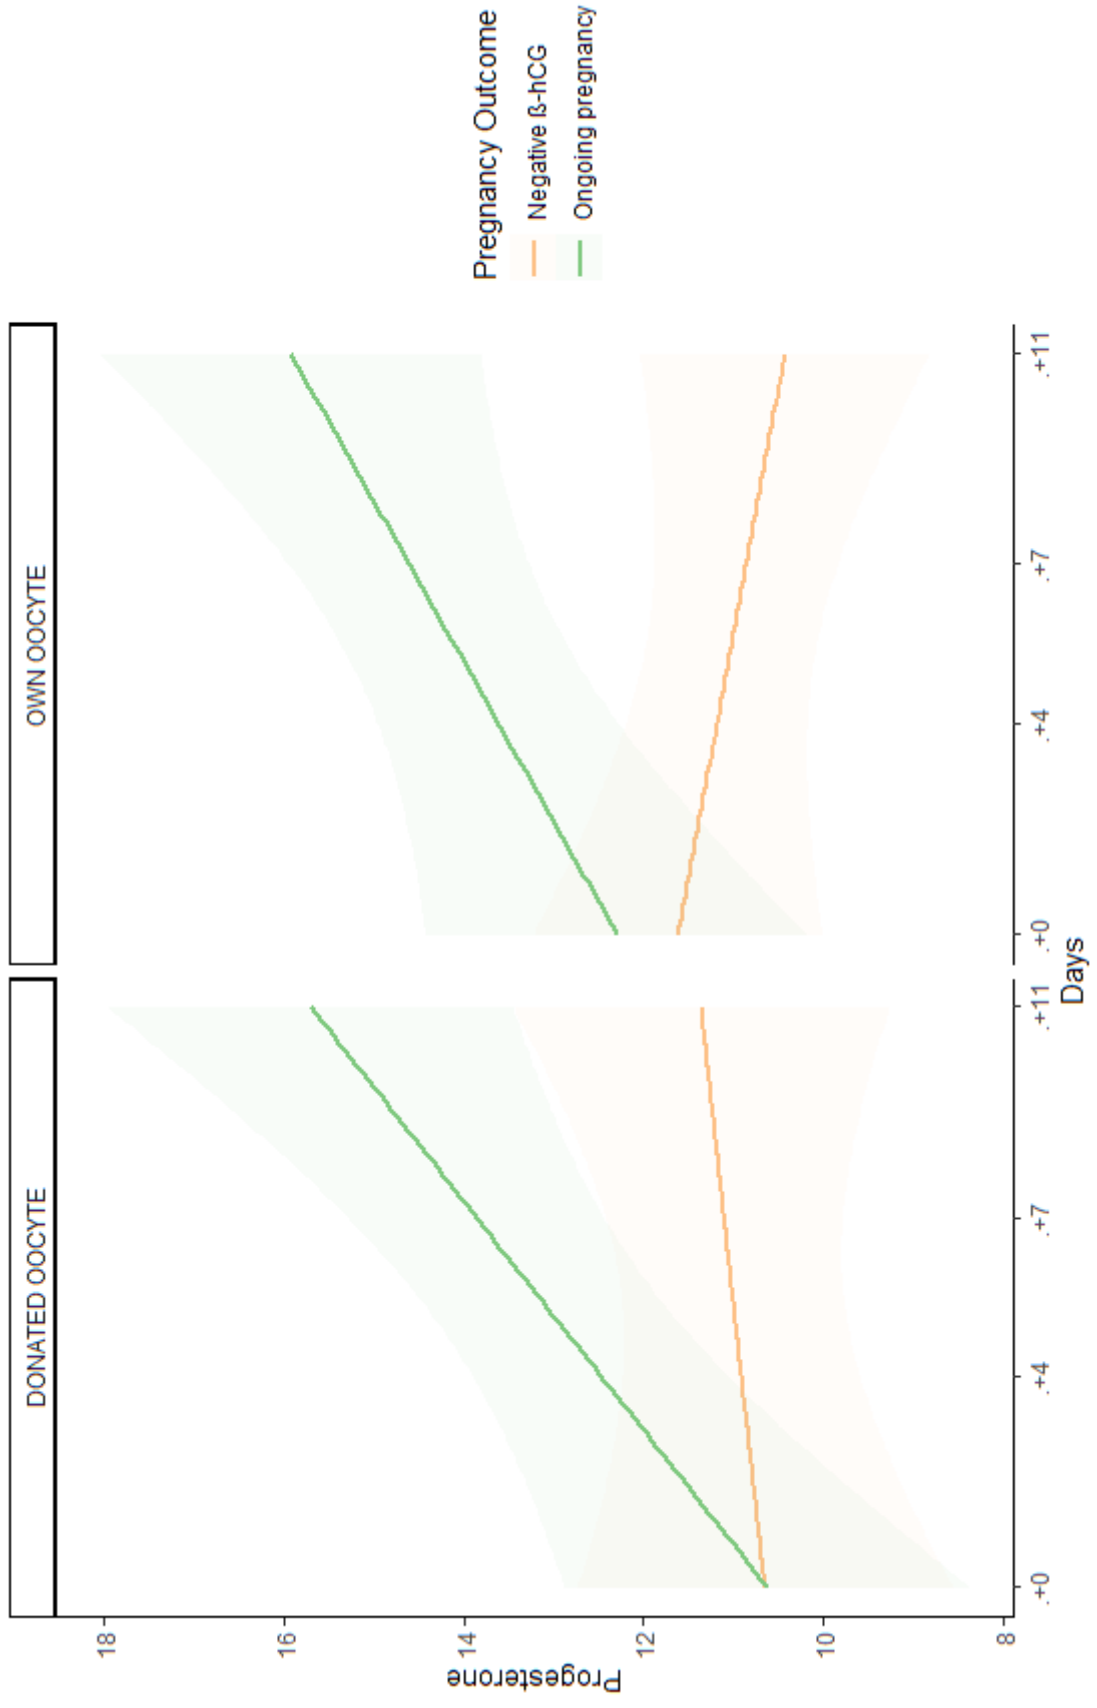

Supplement: DataSheet_1.pdf [file DataSheet_1.pdf]
